# 1 Characterization of the workplace 2 chemical exposome using untargeted 3 LC-MS/MS: a case study

4  
5  
6  
7 Laura-Isobel McCall <sup>a b \*</sup>, Victoria M. Anderson <sup>a</sup>, Robert S. Fogle, III <sup>a d</sup>, Jacob J. Haffner <sup>c</sup>,  
8 Ekram Hossain <sup>a</sup>, Renmeng Liu <sup>a</sup>, Anita H. Ly <sup>a</sup>, Hongyan Ma <sup>a</sup>, Maham Nadeem <sup>a</sup>, Songyuan  
9 Yao <sup>a</sup>

10  
11 <sup>a</sup> University of Oklahoma, Department of Chemistry and Biochemistry, 101 Stephenson  
12 Parkway, Norman, OK USA 73019

13 <sup>b</sup> University of Oklahoma, Department of Microbiology and Plant Biology, 770 Van Vleet Oval,  
14 Norman, OK USA 73019

15 <sup>c</sup> University of Oklahoma, Department of Anthropology, Dale Hall Tower Room 521, 455 West  
16 Lindsey, Norman, OK USA 73019

17 <sup>d</sup> University of Oklahoma, Department of Cellular and Behavioral Neurobiology

18  
19  
20  
21 **\* Corresponding author:**

22 Laura-Isobel McCall

23 [lmccall@ou.edu](mailto:lmccall@ou.edu)

24 101 Stephenson Parkway, office 3770

25 Norman, OK USA 73019-5251

26 Office phone: (405) 325-9385

27 Fax: (405) 325-6111

28  
29 E-mail addresses:

30 [lmccall@ou.edu](mailto:lmccall@ou.edu)

31 [vickyanderson@ou.edu](mailto:vickyanderson@ou.edu)

32 [robert.s.fogle-1@ou.edu](mailto:robert.s.fogle-1@ou.edu)

33 [jacob.haffner@ou.edu](mailto:jacob.haffner@ou.edu)

34 [ehossain@ou.edu](mailto:ehossain@ou.edu)

35 [renmengliu@ou.edu](mailto:renmengliu@ou.edu)

36 [anita.ly8@ou.edu](mailto:anita.ly8@ou.edu)

37 [hongyan.ma@ou.edu](mailto:hongyan.ma@ou.edu)

38 [maham.nadeem-1@ou.edu](mailto:maham.nadeem-1@ou.edu)

39 [songyuan.yao-1@ou.edu](mailto:songyuan.yao-1@ou.edu)

## 40 Abstract

41 Western people now spend close to 90% of their time indoors, one-quarter of which occurs at  
42 their place of employment. As such, interactions between employees and the workplace built  
43 environment have significant potential impact on employee health and safety. However, the  
44 range of workers' daily chemical exposures is still poorly understood. Likewise, the influence of  
45 workers themselves and of worker behavior on the chemical composition of the workplace is still  
46 unknown. In this case study, we used untargeted liquid chromatography-tandem mass  
47 spectrometry (LC-MS/MS) to compare the chemical signatures of three different types of  
48 workplaces: scientific research buildings, office buildings, and one mixed-purpose building. Our  
49 results identified differential signatures of public building surfaces based on building purpose,  
50 sampling location and surface materials. Overall, these results are helping define the influence  
51 of human behavior on the workplace chemical environment and identify the chemical hazards to  
52 which people are exposed throughout their workday.

53

## 54 Highlights

- 55 • Implementation of untargeted liquid chromatography-tandem mass spectrometry to  
56 study workplace chemical exposures.
- 57 • Shared chemical signatures were identified based on building purpose.
- 58 • Differential chemical signatures were identified based on surface material and sampling  
59 location.
- 60 • Annotated molecules include pharmaceuticals, illicit drugs, food chemicals, constituents  
61 of paints and stains, and cleaning products.

## 62 Keywords

63 Built environment

64 Workplace chemical exposures

65 Untargeted metabolomics

66 Liquid chromatography-tandem mass spectrometry

67

## 68 Abbreviations

69 LC-MS/MS: liquid chromatography-tandem mass spectrometry

70 *m/z*: mass over charge ratio

71 RT: retention time

72

## 73 Introduction

74 Buildings are living spaces, housing vast numbers of bacteria in addition to their human  
75 occupants. There has been significant research into the microbiome of the built environment  
76 [1][2]. These studies showed distinct built environment microbiome based on room usage, such  
77 as for example distinctions between the microbiome of bathrooms, offices and kitchens [1][3][4],  
78 Human skin and outdoor environment are the major sources of the built environment  
79 microbiome [1]. However, these microbial surveys provide little insight into the functional  
80 consequences of these microbial colonizations. Metabolomic surveys of the built environment  
81 have the potential to identify not just products of microbial metabolism, but also the interactions  
82 between human building occupants and building surfaces. Such studies usually use mass

83 spectrometry in combination with chromatographic separation (gas chromatography, or,  
84 increasingly, liquid chromatography), to identify and quantify the small molecules present in  
85 building air (e.g. [5]) or on building surfaces (e.g. [6][7][8]). In targeted metabolomics studies,  
86 researchers focus on a list of molecules of interest, usually known to be hazardous to human  
87 health. Such studies in the context of the built environment have for example quantified dust  
88 antimicrobial levels in houses and in workout rooms, hallways and offices of athletic facilities  
89 [9], or pesticide levels on household floors [6]. Untargeted metabolomics studies, in contrast,  
90 seek to detect the broadest possible range of molecules, with no *a priori* bias as to which  
91 molecules are interesting. Detected molecules include microbial products, but also compounds  
92 being leached by building surfaces (plasticizers, paint constituents...), cleaning products, and  
93 molecules deposited by building occupants themselves (e.g. beauty products, food derivatives)  
94 [7][8]. Such results can provide valuable information into a building's usage and its occupants'  
95 behavior.

96         While the majority of molecules found in buildings are likely innocuous, some can have  
97 an impact on people's health. Workplace exposure to inhaled anesthetics for example is a  
98 known health risk for workers in the medical field [10], while dermal exposure to antimicrobials,  
99 detergents, dyes and disinfectants put healthcare and personal care workers at risk of  
100 occupational dermatitis [11]. Importantly, Petras et al revealed that laboratory chemicals are  
101 being spread outside of the laboratory [7], so that such molecules could have an impact not just  
102 on the health of the workers handling them, but also on visitors. We therefore sought to  
103 determine whether surface chemical risk exposures differ by building function. Surface samples  
104 were collected from public surfaces in two buildings dedicated to scientific research, two office  
105 buildings, and one mixed-purpose building housing teaching laboratories, offices and lecture  
106 rooms. Collected samples were analyzed by liquid chromatography-tandem mass spectrometry  
107 (LC-MS/MS) and grouped into chemical families using molecular networking. We observed that  
108 buildings with distinct purposes had different chemical profiles. Detected chemicals were also

109 influenced by sampling location (floor vs door handles, for example) and surface material.  
110 Overall, these results illustrate the unique chemical risks to which building occupants are  
111 exposed depending on building purpose, and the interaction between building occupants and  
112 building surfaces. This data can help guide employee personal protection safeguards and  
113 inform building cleaning practices, while also providing insight into human behavior at sampled  
114 locations.

115

## 116 Materials and Methods

### 117 Sample collection

118 Two hundred and forty locations were sampled from five different buildings, including  
119 two laboratory, two office buildings and one high-traffic mixed-purpose building (housing offices,  
120 classrooms, and teaching laboratories). We refer to the laboratory buildings as buildings 1 and  
121 2. Office buildings in this study are described as buildings 3 and 4, and the mixed-purpose  
122 building as building 5. The two laboratory and office buildings are within less than half a mile of  
123 each other within the same research park, and were all built as part of a concentrated  
124 construction effort. They are 2-14 years old. The mixed-purpose building is 2.3 miles away from  
125 the other buildings. It has been in constant use for the past 47 years. The locations that were  
126 swabbed within each building were kept consistent and included: the right side of the main stair  
127 handrail going up, elevator buttons, the floor in front of six to nine labs or offices, the right  
128 armrest of couches, three wastebaskets, the outer door handle of three offices or labs, the inner  
129 building door handles, the floor by the exit door, light switches, and the water fountain. Each  
130 location swabbed was documented either with photos or detailed description. Cotton swabs  
131 were washed three times in 50% ethanol (all solvents were LC-MS grade) and soaked in 50%

132 ethanol prior to use. The areas were swabbed for thirty seconds before placing the swabs in a  
133 deep 96-well plate containing 500  $\mu$ L of 50% ethanol. For negative control, every twelfth  
134 sample was a blank swab in 50% ethanol. After samples had been collected, plates were sealed  
135 to prevent sample contamination and placed at 4°C overnight for further extraction. Swabs were  
136 then removed and extracts dried down (Thermo Fisher speedvac vacuum concentrator).

137

## 138 Liquid chromatography- tandem mass spectrometry

139 LC-MS/MS sample preparation was performed by resuspending dried extracts in 50%  
140 methanol (spiked with 0.5  $\mu$ g/mL sulfadimethoxine internal standard), with an injection volume of  
141 20  $\mu$ L. Column used in this analysis was a C18 core-shell column (Kinetex, 50x2.1 mm, 1.7  $\mu$ M  
142 particle size, 100 Å pore size, Phenomenex, Torrance, USA). Mobile phase consisted of a two-  
143 solvent gradient (Solvent A: H<sub>2</sub>O+0.1% formic acid, Solvent B: Acetonitrile+0.1% formic acid).  
144 Gradient parameters were: 5% B for 1 min, then linear increase from 5% B to 100% B over 8  
145 minutes, hold at 100% B for 2 minutes and return to 5% B in 30 seconds, with a subsequent 1  
146 min re-equilibration phase at 5% B. Column temperature was maintained at 40°C and sample  
147 compartment at 10°C for the entirety of the analysis. Samples were run in randomized order  
148 with blanks every 12 samples; blanks alternated between swab blanks (blank swab extracted  
149 with 50% ethanol) and plate blanks (50% methanol plus internal standard only). Electrospray  
150 (ESI) parameters were set at 35 L/min, 10 L/min auxiliary gas flow rate, 0 L/min sweep gas flow  
151 rate, and 350°C auxiliary gas temperature. The spray voltage was set to 3.8 kV, S-lens RF level  
152 was at 50 V and the capillary temperature was set at 320°C. Data was acquired in positive  
153 mode, with data-dependent MS<sup>2</sup> acquisition. The MS scans had a scan range of 100-1500 m/z  
154 and 5 MS/MS scans of the most abundant ion per cycle were recorded. Resolution for MS<sup>1</sup> was  
155 set to 35,000 and 17,500 for MS<sup>2</sup>. Maximum injection time for both MS<sup>1</sup> and MS<sup>2</sup> was set at  
156 100 ms. Full MS AGC target was 1e6. MS/MS AGC target was 5e5. An isolation window of 2

157 m/z was selected. Normalized collision energy was incrementally increased from 20% to 30%  
158 and to 40%. MS/MS occurred at an apex of 2-8 seconds with a dynamic exclusion of 10  
159 seconds. Last, ions with unassigned charges were excluded from instrumental analysis.

160

## 161 Data analysis

162 Raw MS data files were converted to mzXML format using MSconvert software  
163 (<http://proteowizard.sourceforge.net/tools.shtml>). MS features were identified using MZmine (v.  
164 2.33) using parameters shown in Table 1 [12]. Only features with abundance >5 times  
165 abundance in blank swab samples were retained. Total ion current (TIC) normalization was  
166 performed using the R language implemented in Jupyter Notebook (<http://jupyter.org/>).  
167 Principal Coordinate Analysis (PCoA) plots of MS features were created from a Canberra  
168 dissimilarity matrix, using an in-house clustering script. Distance matrices were obtained using  
169 QIIME 1 [12,13], and PERMANOVA calculations performed using the R package “vegan”. To  
170 identify differential features between locations, the 1,000 most abundant features were  
171 examined using random forest machine learning approaches in R in Jupyter Notebooks, using  
172 5,000 trees and classifying based on building type. Cross-validation was performed by splitting  
173 the data 80-20 using the R package “caret”, training the random forest model on 80% of the  
174 data (training dataset), and then assessing classification accuracy on the remainder of the  
175 dataset (test dataset). Data log-transformed using MetaboAnalyst  
176 (<https://www.metaboanalyst.ca>)[14] was analyzed by one-way or Welch’s ANOVA, depending  
177 on the within-group variance, using in-house developed R script. Molecular networking was  
178 performed using the Global Natural Products Social Molecular Networking (GNPS) online  
179 platform [15] on the .mgf file exported from MZmine, using the following parameters: precursor  
180 ion and fragment ion mass tolerance: 0.02 Da; minimum cosine score for networking and library  
181 matching: 0.7; minimum number of matched MS2 fragment ions for networking and library

182 matching: 4; network topK: 50; maximum connected component size: 100; analog search:  
183 enabled; maximum analog mass difference: 100 Da; precursor window filtering: enabled; 50 Da  
184 peak window filtering: enabled; row sum normalization. Libraries searched were all GNPS  
185 spectral libraries, METLIN, LipidBlast, NIST\_17, and an in-house library of contaminants. These  
186 search parameters are associated with less than 5% false discovery rates [16]; annotations  
187 were further curated manually based on mirror plot appearance and plausibility of the chemical  
188 changes for analog matches. Generated annotations are at level 2/3 as defined by the  
189 metabolomics standard initiative (putatively annotated compounds or compound classes) [17].  
190 Networks were visualized using Cytoscape version 3.7.0 [18]. Matching to previous studies of  
191 the built environment or humans was performed using the single spectrum search option in  
192 GNPS, with the following search parameters: parent and fragment ion tolerance, 0.02 Da;  
193 minimum matched peaks: 4; score threshold: 0.7; do not search unclustered data or analogs;  
194 precursor and 50 Da peak window filtering, enabled. Chemical structures were generated using  
195 ChemDraw software (Perkin Elmer).  
196

|                                                   |                                      |           |
|---------------------------------------------------|--------------------------------------|-----------|
| Mass Detection                                    | MS1 Noise Level                      | 1.20E+05  |
|                                                   | MS2 Noise Level                      | 1E+03     |
|                                                   | Mass Detector                        | Centroid  |
| Chromatogram Builder<br>Baseline cutoff algorithm | Minimum Time Span (min)              | 0.05      |
|                                                   | Minimum Height                       | 1.70E+06  |
|                                                   | m/z tolerance (ppm)                  | 10        |
| Chromatogram Deconvolution                        | Minimum Peak Height                  | 1.70E+06  |
|                                                   | Peak Duration Range                  | 0.00-2.00 |
|                                                   | Baseline Level                       | 1.00E+06  |
|                                                   | m/z Range for MS2 Scan Pairing (Da)  | 0.01      |
|                                                   | RT Range for MS2 Scan Pairing (min.) | 0.10      |



|                       |                                |                   |
|-----------------------|--------------------------------|-------------------|
| Isotopic Peak Grouper | Retention Time Tolerance (min) | 0.10              |
|                       | <i>m/z</i> tolerance (ppm)     | 10                |
|                       | Monotonic Shape                | Yes               |
|                       | Maximum Charge                 | 3                 |
|                       | Representative isotope         | Lowest <i>m/z</i> |
| Join aligner          | <i>m/z</i> tolerance (ppm)     | 10                |
|                       | <i>m/z</i> to RT weight        | 5 to 1            |
|                       | Retention Time Tolerance (min) | 0.10              |
| Row filtering         | Retention Time                 | 0.20-12 min       |
|                       | Keep only peaks with MS2 scan  | enabled           |

197 **Table 1. MZmine Parameters used in Data Analysis.**

## 198 Data availability

199 LC-MS/MS data has been deposited in MassIVE under accession number

200 MSV000082953. Molecular network can be accessed at

201 <https://gnps.ucsd.edu/ProteoSAFe/status.jsp?task=70c1775687724c8cacc0a324208a91c4>

202 (overall analysis) and

203 <https://gnps.ucsd.edu/ProteoSAFe/status.jsp?task=540b7367604648b0941b6ac37ac5e314>

204 (dataset matching).

205

## 206 Results

### 207 Surface metabolite profile segregates by building usage

208 To determine the impact of building use on a building's chemical profile, we collected

209 surface chemicals from five buildings, all within 2.3 miles of each other, including two buildings

210 used for scientific research, two office buildings, and one mixed-purpose building housing  
211 classrooms, teaching laboratories and offices. Samples were collected by swabbing public  
212 areas of the buildings, including stair handrail, elevator buttons, floors outside offices or lab,  
213 couches, light switches, garbage can lids and door handles. Molecules were extracted from  
214 swabs using 50% ethanol and analyzed by liquid chromatography-tandem mass spectrometry,  
215 followed by processing using MZmine2 [12] to extract molecular features, and molecular  
216 networking for feature annotation and grouping into chemical families [15]. Overall, this  
217 analytical approach detected 23,030 molecular features, which were grouped into 2,599  
218 chemical families and 8,736 singletons (features not grouped into families) (Fig. S6).

219 To evaluate and visualize the similarities between samples from different building types,  
220 principal coordinate analysis (PCoA) was performed. PCoA analysis showed clustering based  
221 on the different building types (**Fig. 1A** PERMANOVA  $p < 0.001$ , **Fig. S3**), indicating common  
222 chemical profiles based on building usage and a clear distinction between research, mixed-  
223 purpose and office buildings. We further subset our dataset to only perform PCoA analysis on  
224 office vs research buildings. Results showed distinct clustering (indicating different overall  
225 chemical composition) between office and research buildings, with some of the most differential  
226 samples coming from door handles and stairway railings (**Fig. 1B** PERMANOVA  $p < 0.001$ ). In  
227 accordance with our hypothesis of shaping of the building surface metabolome by building  
228 function, there was considerable overlap between our mixed-purpose building and other building  
229 types, as evidenced by close clustering of samples from the mixed-purpose building with  
230 samples from the other building types by PCoA analysis (**Fig. 1A**), higher mis-classification of  
231 building 5-derived samples by our random forest classifier (**Fig. 1C**), and lower frequency of  
232 molecular features unique to this building (**Fig. 1G, Fig. S1**). Indeed, 11.33% of molecular  
233 features identified in our mixed-purpose building were also identified in research buildings, and  
234 6.05% were shared between the mixed-purpose building and office buildings.

235           Next, we sought to determine which molecular features were key “signatures” of building  
236 usage. We performed random forest classification analysis [19] on the top 1000 most abundant  
237 features in our dataset. Random forest analysis showed excellent classification accuracy (**Fig.**  
238 **1C**), supporting the presence of differential chemical profiles based on building usage, in  
239 accordance with our PCoA analysis results. Most of the chemicals identified by random forest  
240 as differing between buildings based on building purpose could not be annotated, but many  
241 have been reported in other studies of the built environment (**Table 2, Fig. S2**). Strikingly,  
242 several molecular features, including  $m/z$  272.258 RT 4.75 min,  $m/z$  425.252 RT 3.91 min and  
243  $m/z$  819.474 RT 6.74 min, all of which were highest in the research and mixed-purpose  
244 buildings (**Fig. S4**), were previously detected on water fountains from a research building  
245 (MassIVE dataset MSV000079720, [7]).  $m/z$  470.369 RT 6.12 was found across all building  
246 types in our study, with the highest levels in our office buildings (**Fig. S4**); in accordance with  
247 these observations, it was reported in a variety of built environment settings: research building  
248 water fountain, apartment and researcher’s office inside a science building (**Table 2**). Piperine,  
249 a food-derived molecule, was reported in human studies and in an analysis of apartment  
250 surfaces; we detected it in our mixed-purpose building. In contrast, several of our differential  
251 surface features have not yet been reported on studies of the built environment but have been  
252 detected in human-derived samples. While the lack of reports in the context of the built  
253 environment may merely reflect the bias of much of current metabolomics research towards  
254 human analysis, these shared reports suggest molecular exchange between building occupants  
255 and building surfaces. For example,  $m/z$  279.232 RT 7.06, annotated as the plant-derived fatty  
256 acid linolenic acid and palmitoyl ethanolamide ( $m/z$  300.289 RT 7.42 min), a human-produced  
257 fatty acid amide, were both highest in our high-traffic mixed-purpose building and previously  
258 identified in human metabolomics studies. In contrast, detection of chemicals such as tris(2-  
259 butoxyethyl) phosphate, a flame retardant and plasticizer, and diethyl phthalate ( $m/z$  223.095  
260 RT 4.72 min), a plasticizer, sealant and coating constituent, in prior human studies suggest

261 transfer of chemicals from built environment surfaces to humans. Other notable differential  
 262 molecules include a derivative of N-(2-Hydroxypropyl)dodecanamide (cosmetic constituent) and  
 263 food derivatives at higher levels in mixed-purpose and research buildings. This may reflect  
 264 building occupant behavior and the higher human traffic into these buildings compared to our  
 265 office locations.

| <i>m/z</i> | RT (min) | Annotation                                                        | Cosine score | Mass difference to library reference | ppm error | ANOVA <i>p</i> -value | Previously identified in human or built environment studies (deposited in MassIVE)? |
|------------|----------|-------------------------------------------------------------------|--------------|--------------------------------------|-----------|-----------------------|-------------------------------------------------------------------------------------|
| 115.075    | 6.39     | -                                                                 | -            | -                                    | -         | 4.60E-9               | No                                                                                  |
| 121.040    | 0.37     | -                                                                 | -            | -                                    | -         | 5.49E-5               | No                                                                                  |
| 139.050    | 0.31     | -                                                                 | -            | -                                    | -         | 9.06E-7               | No                                                                                  |
| 149.023    | 4.72     | -                                                                 | -            | -                                    | -         | 7.57E-7               | No                                                                                  |
| 223.095    | 4.72     | Diethyl phthalate                                                 | 0.94         | 0.00                                 | 0.00      | 2.54E-6               | Human                                                                               |
| 272.258    | 4.75     | -                                                                 | -            | -                                    | -         | 9.70E-3               | Human and built environment (science building water fountain)                       |
| 279.232    | 7.06     | Linolenic acid (-CH <sub>2</sub> match to methyl-linolenate)      | 0.83         | 14.02                                | -3.22     | 1.19E-9               | Human                                                                               |
| 286.143    | 5.21     | Piperine                                                          | 0.97         | 0.00                                 | -1.05     | 3.00E-4               | Human and built environment (housing)                                               |
| 286.274    | 4.85     | N-(2-Hydroxypropyl)dodecanamide (+C <sub>2</sub> H <sub>4</sub> ) | 0.97         | 28.03                                | -3.14     | 5.78E-3               | No                                                                                  |

|         |      |                                                                                                                                                            |      |       |       |          |                                                                |
|---------|------|------------------------------------------------------------------------------------------------------------------------------------------------------------|------|-------|-------|----------|----------------------------------------------------------------|
| 299.162 | 4.05 | 1,7-bis(4-hydroxyphenyl)heptane-3,5-diol (-H <sub>2</sub> O)                                                                                               | 0.90 | 18.01 | -4.10 | 3.34E-9  | Human                                                          |
| 300.289 | 7.42 | Palmitoyl ethanolamide                                                                                                                                     | 0.99 | 0.00  | -4.33 | 3.49E-5  | Human                                                          |
| 343.188 | 4.94 | Tris(2-butoxyethyl) phosphate (-C <sub>4</sub> H <sub>8</sub> to [M+H] <sup>+</sup> adduct)                                                                | 0.89 | 56.06 | -2.61 | 2.49E-9  | Human                                                          |
| 343.211 | 5.18 | -                                                                                                                                                          | -    | -     | -     | 1.00E-4  | No                                                             |
| 365.170 | 4.94 | Tris(2-butoxyethyl) phosphate (-C <sub>4</sub> H <sub>8</sub> to [M+Na] <sup>+</sup> adduct)                                                               | 0.88 | 56.06 | -2.19 | 1.34E-9  | Human and built environment (science building water fountain)  |
| 386.238 | 2.46 | -                                                                                                                                                          | -    | -     | -     | 1.26E-7  | Human                                                          |
| 387.200 | 4.34 | (4S)-4-hydroxy-3,5,5-trimethyl-4-[(E)-3-[(2R,3R,4S,5S,6R)-3,4,5-trihydroxy-6-(hydroxymethyl)oxan-2-yl]oxybut-1-enyl]cyclohex-2-en-1-one (Corchoionoside C) | 0.83 | 0.00  | -2.32 | 8.61E-2  | No                                                             |
| 413.229 | 6.39 | -                                                                                                                                                          | -    | -     | -     | 4.54E-9  | Too few MS/MS peaks to enable confident dataset matching       |
| 421.232 | 6.74 | Tris(2-butoxyethyl) phosphate ([M+Na] <sup>+</sup> )                                                                                                       | 0.92 | 0.00  | -2.61 | 1.09E-11 | Human and built environment (office inside a science building) |
| 425.252 | 3.91 | -                                                                                                                                                          | -    | -     | -     | 3.40E-3  | Human and built environment                                    |

|         |      |   |   |   |   |         |                                                                                                          |
|---------|------|---|---|---|---|---------|----------------------------------------------------------------------------------------------------------|
|         |      |   |   |   |   |         | (science building water fountain and housing)                                                            |
| 435.211 | 6.39 | - | - | - | - | 1.19E-9 | Human and built environment (office inside a science building)                                           |
| 470.369 | 6.12 | - | - | - | - | 8.15E-6 | Human and built environment (science building water fountain; housing; office inside a science building) |
| 504.319 | 3.95 | - | - | - | - | 8.97E-6 | Human and built environment (apartment)                                                                  |
| 509.273 | 3.95 | - | - | - | - | 1.55E-6 | Too few MS/MS peaks to enable confident dataset matching                                                 |
| 514.395 | 6.13 | - | - | - | - | 4.49E-6 | Human                                                                                                    |
| 548.345 | 4.02 | - | - | - | - | 9.07E-6 | Human and built environment (apartment)                                                                  |
| 553.299 | 4.02 | - | - | - | - | 4.49E-6 | Too few MS/MS peaks to enable confident dataset matching                                                 |
| 592.370 | 4.08 | - | - | - | - | 1.24E-5 | Human and built environment (apartment)                                                                  |
| 597.324 | 4.07 | - | - | - | - | 9.01E-8 | No                                                                                                       |

|         |      |                                          |      |      |       |          |                                                               |
|---------|------|------------------------------------------|------|------|-------|----------|---------------------------------------------------------------|
| 602.446 | 6.14 | -                                        | -    | -    | -     | 1.06E-6  | No                                                            |
| 819.474 | 6.74 | Tris(2-butoxyethyl) phosphate ([2M+Na]⁺) | 0.86 | 0.03 | -3.42 | 9.09E-10 | Human and built environment (science building water fountain) |

266 **Table 2. Top 30 most differential features, as identified by random forest classifier.**

267

268 Finally, we considered molecules unique to a given building. Such molecules can  
269 provide insight into the unique activities of that building's occupants. For example, we found  
270 many pharmaceuticals and illicit drugs in our high-traffic building. These included erythromycin  
271 (antibacterial), cyclobenzaprine (muscle relaxant) on a building entrance door handle and  
272 cocaine in many sampling locations. Plant-derived molecules such as caryophyllene oxide or  
273 oleanolic acid were also found in several locations. Locations varied from floors to doors and  
274 also included elevator interiors. Pharmaceuticals and illicit drugs were most commonly found on  
275 high-touch surfaces (e.g. doorknobs/handles), however illicit drugs were also more prevalent on  
276 surfaces which did not receive as much cleaning (a wooden statue, for example). (**Table 3, Fig.**  
277 **S10**). Overall, these results provide a snapshot into the diversity of possible chemical exposures  
278 when entering any given building.

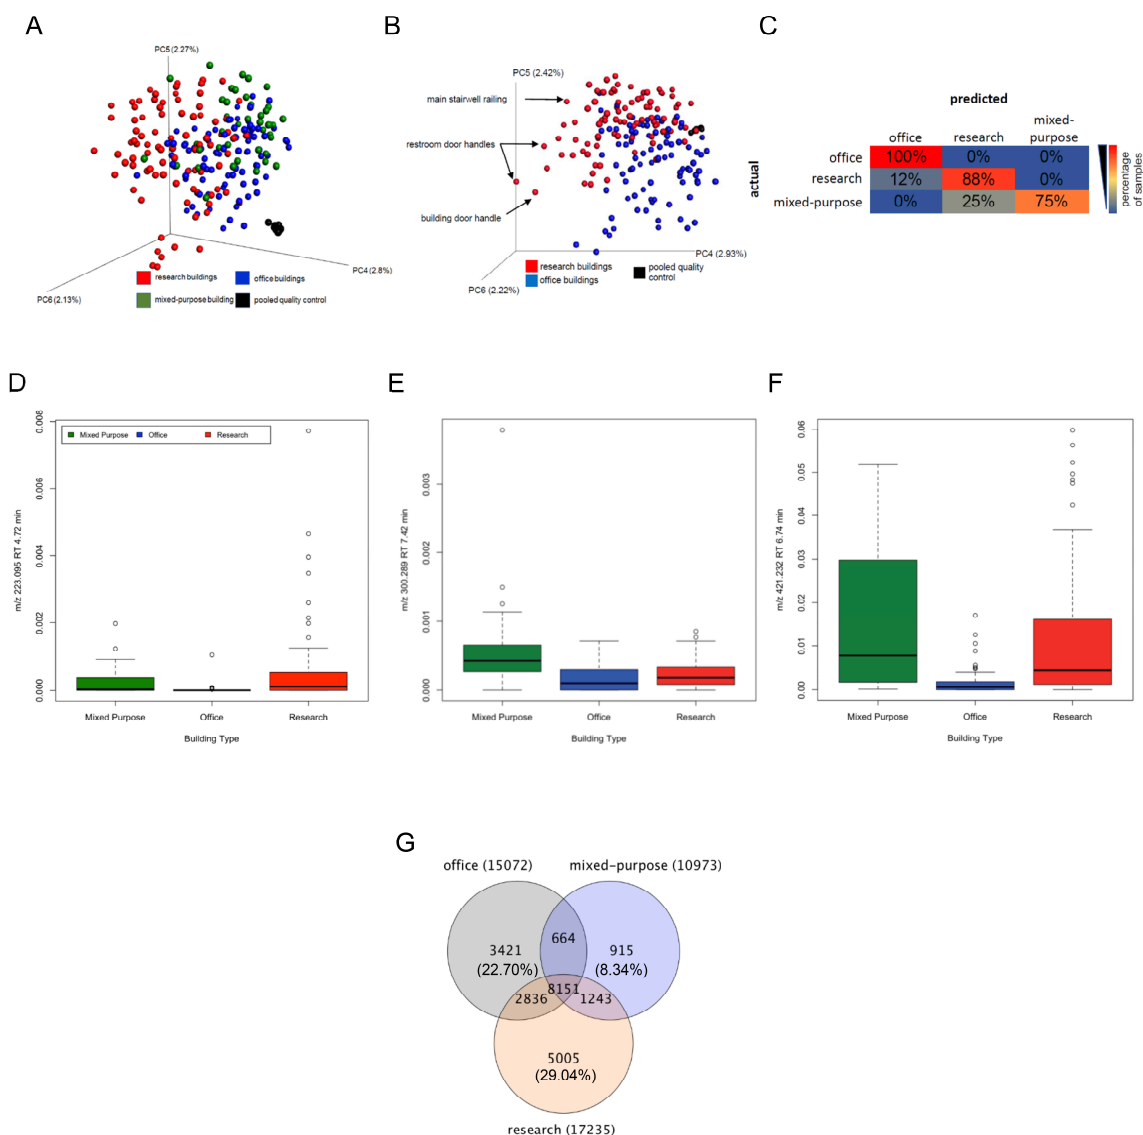

279 **Figure 1. Differential building surface chemical profile depending on building**  
 280 **function.** (A) Principal coordinate analysis showing partial segregation of samples  
 281 based on building type, comparing office, research and mixed-purpose buildings  
 282 (Canberra distance metric;  $p < 0.001$  PERMANOVA). (B) Principal coordinate analysis  
 283 showing partial segregation of samples based on building type, comparing office and  
 284 research buildings only (Canberra distance metric;  $p < 0.001$  PERMANOVA). (C) Random  
 285 Forest classification results on test dataset. High classification accuracy was obtained,  
 286 indicating that all three building types present distinct chemical profiles. Correct  
 287 classification is along the diagonal. Percentage of samples classified into each category  
 288 are displayed. (D-F) Representative differentially-abundant molecules between building  
 289 types, as identified by random forest analysis: diethyl phthalate (D), palmitoyl  
 290 ethanolamide (E), tris(2-butoxyethyl) phosphate (F). (G) Venn diagram showing features  
 291 unique to each building type, with the lowest proportion of unique molecules found in our  
 292 mixed-purpose building.



## 293 Common chemical signatures based on sampling location

294 Samples were collected from a variety of surfaces and locations within buildings. We  
295 also observed significant heterogeneity in recovered molecule abundance even within a given  
296 building (**Fig. S4**), suggesting an impact of the location sampled within a given building. We  
297 therefore visualized the impact of sampling location by PCoA analysis. Overall, we observed  
298 significant differences in overall chemical profile between surfaces on which people walk (floors  
299 in front of offices and labs, elevator floor) and surfaces people touch (handrails, door handles,  
300 elevator buttons etc.) (**Fig. 2A**, PERMANOVA  $p < 0.001$ ). Examples of molecules commonly  
301 found on floors but not on door handles include pesticide constituents (piperonyl butoxide,  $m/z$   
302 356.243 RT 6.99 min); detergents (nonaethylene glycol,  $m/z$  415.254 RT 7.51 min) and plant-  
303 derived molecules (astragalin derivative,  $m/z$  465.1027 RT 3.25 min; some flavonoids ( $m/z$  565.118  
304 RT 3.66 min and  $m/z$  757.217 RT 3.02 min; **Table 3, Fig. S10**). Likewise, molecules found on  
305 surfaces people touch but not on floors include 4-(2-Hydroxyethyl)piperazine-1-ethanesulfonic acid  
306 (HEPES; research chemical found in laboratory building;  $m/z$  239.106 RT 0.28 min); patchouli alcohol  
307 ( $m/z$  135.117 RT 4.85 min) and cholesterol ( $m/z$  369.351 RT 10.49 min) (**Table 3, Fig. Sxx**).

308 Different sampling locations were often made of different materials, so we also assessed  
309 the contribution of the surface material to the recovered chemical profile. For simplicity, the  
310 types of materials were filtered down to plastic, metal, cloth, wood, linoleum, and leather (**Fig.**  
311 **2B**). Using the same Canberra distance matrix, we observed statistically significant clustering of  
312 samples based on the surface material (**Fig. 2B** PERMANOVA  $p < 0.001$ ). The greatest diversity  
313 of unique chemicals were recovered from metal surfaces (**Fig. 2C, Fig. S9**), which could be  
314 because most samples collected from metal surfaces are from commonly-touched places of  
315 research buildings or offices (door handles, elevator buttons etc.). Chemical families identified  
316 from metal surfaces include food constituents, personal care products and home use products  
317 (**Fig. S9**). The unique chemical families identified from the plastic surfaces mainly come from

318 food or cleaning products (*e.g.* guineesine, a compound found in pepper; **Fig. 2D**), while the  
319 chemicals identified from the wood surface may come from coatings or personal care products  
320 (*e.g.* Bis(2,2,6,6-tetramethyl-4-piperidyl) sebacate; **Fig. 2E**). From the cloth surfaces,  
321 compounds from plants were often identified, possibly due to their location in building  
322 lunchrooms where food is likely to be spilled (**Fig. S8**).  
323

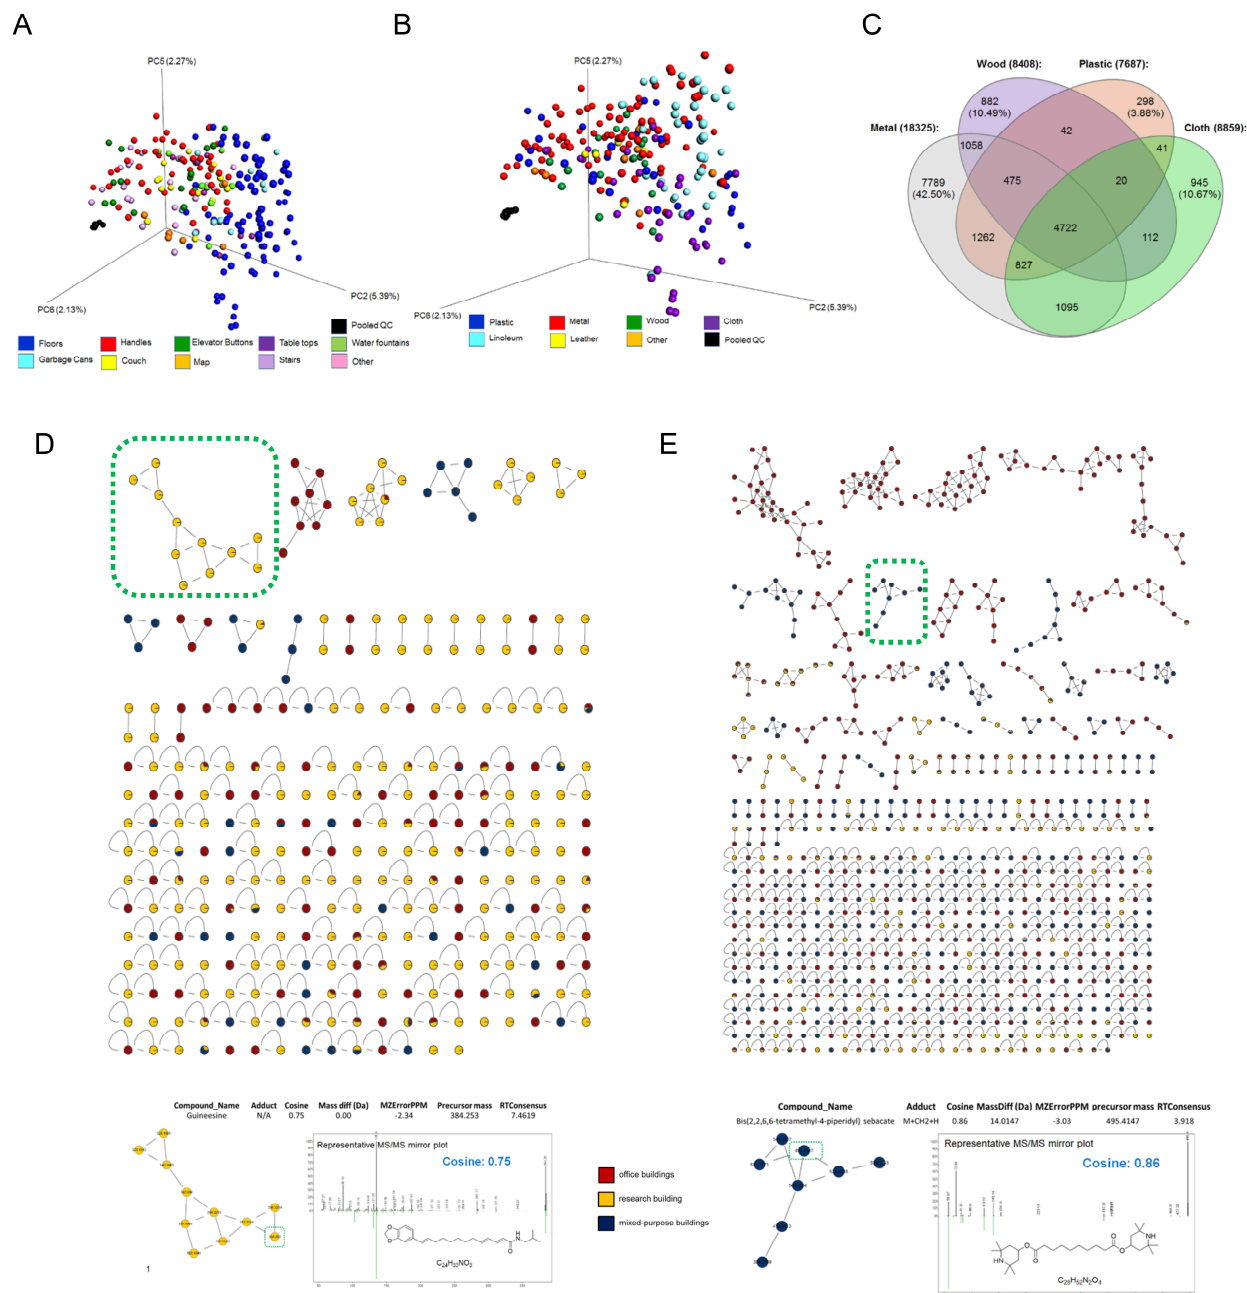

324 **Figure 2. Significant impact of surface material on the recovered chemical profile.**  
 325 (A) Principal coordinate analysis showing segregation of samples based on sampling  
 326 location within the three building types (Canberra distance metric;  $p < 0.001$   
 327 PERMANOVA). (B) Significant clustering of samples based on surface material, by  
 328 principal coordinate analysis (Canberra distance metric;  $p < 0.001$  PERMANOVA). (C)  
 329 Venn diagram showing the percent of recovered molecules unique to each material type.  
 330 Metal surfaces yielded the highest numbers of unique chemical features. (D-E) Chemical  
 331 families unique to each surface material. (D) Subnetworks of unique compounds  
 332 identified from plastic (top) and representative chemical family (bottom). (E)  
 333 Subnetworks of unique compounds identified from wood (top) and representative  
 334 chemical family (bottom).  
 335

336 Finally, we investigated features common across all buildings. These represent  
337 chemicals that most people are likely to encounter over the course of their workweek. Molecules  
338 commonly detected across all buildings include biological derivatives (fatty acids, amino acids,  
339 other related biomolecules), commonly found on high-touch surfaces which were not regularly  
340 cleaned (e.g. elevator buttons, door handles/knobs), detergents and molecules found in  
341 cleaning products (cocamidopropylbetaine derivatives, benzyldimethylstearylammmonium cation  
342 derivatives) and natural product phytochemicals (presumably from food sources and personal  
343 care products). Compounds such as tangeritin (a natural compound found in the peels of  
344 tangerines and other citrus fruits) and piperine (a natural compound found in black pepper) were  
345 found on commonly touched surfaces, as well as surfaces used in the preparation and/or  
346 consumption of food products. Plasticizers, such as phthalate derivatives, were identified on  
347 multiple surfaces across all building types and on multiple materials. Finally, pharmaceutical  
348 derivatives such as levorphanol and clotrimazole were identified on multiple commonly touched  
349 surfaces across all building types and multiple surface types. Interestingly, both topical and  
350 orally ingested pharmaceuticals were identified on similar surfaces. This suggests that the  
351 scope of passive pharmaceutical exposure expands beyond topical formulations (**Table 3, Fig.**  
352 **S10**).

353

| Rare molecules |          |                                                            |              |                                      |           |                    |                                    |
|----------------|----------|------------------------------------------------------------|--------------|--------------------------------------|-----------|--------------------|------------------------------------|
| <i>m/z</i>     | RT (min) | Annotation                                                 | Cosine score | Mass difference to library reference | ppm error | Function           | Location details                   |
| 201.054        | 5.48     | Piperlongumine                                             | 0.99         | 0.00                                 | -4.48     | Pepper constituent | Microwave table; research building |
| 214.086        | 4.66     | Benzyl nicotinate                                          | 0.91         | 0.00                                 | -3.27     | Skin care product  | Door handle in office building     |
| 239.106        | 0.28     | 4-(2-Hydroxyethyl)piperazine-1-ethanesulfonic acid (HEPES) | 0.82         | 0.00                                 | -2.51     | Research chemical  | Door handle to a lab in            |

|                                                 |          |                     |              |                                      |           |                             | research building                                                                                |
|-------------------------------------------------|----------|---------------------|--------------|--------------------------------------|-----------|-----------------------------|--------------------------------------------------------------------------------------------------|
| 276.175                                         | 4.46     | Cyclobenzaprine     | 0.80         | 0.00                                 | 0.00      | Prescription muscle relaxer | On door handle of entrance to mixed-purpose building                                             |
| 734.468                                         | 4.22     | Erythromycin        | 0.97         | 0.00                                 | 0.00      | Prescription antibiotic     | Found on door leading to main lobby of mixed-purpose building                                    |
| <b>Molecules detected in multiple locations</b> |          |                     |              |                                      |           |                             |                                                                                                  |
| <i>m/z</i>                                      | RT (min) | Annotation          | Cosine score | Mass difference to library reference | ppm error | Function                    | Location details                                                                                 |
| 133.0637                                        | 3.61     | Levorphanol         | 0.91         | 0.00                                 | 0.00      | Opioid pain reliever        | Found in all buildings swabbed on multiple surfaces (handrails, door handles, appliance handles) |
| 135.117                                         | 4.85     | Patchouli alcohol   | 1.00         | 0.00                                 | -5.18     | In beauty products          | Door handle and stair railing; office and research buildings                                     |
| 135.117                                         | 6.62     | Undecanedioic Acid  | 0.99         | 0.00                                 | 0.00      | Fatty acid                  | Seen in all 3 types, primarily research (common-area locations most frequent)                    |
| 205.097                                         | 0.87     | Tryptophan          | 0.99         | 0.00                                 | 0.00      | Amino Acid                  | Found in all buildings swabbed, on multiple surfaces                                             |
| 219.174                                         | 4.41     | Caryophyllene Oxide | 0.86         | 2.02                                 | -2.74     | Essential Oil               | Small wooden                                                                                     |

|          |      |                                        |      |      |       |                                     |                                                                                                    |
|----------|------|----------------------------------------|------|------|-------|-------------------------------------|----------------------------------------------------------------------------------------------------|
|          |      |                                        |      |      |       |                                     | statue in mixed-purpose building                                                                   |
| 219.174  | 6.22 | Nootkatone                             | 0.98 | 0.00 | -3.19 | Grapefruit aroma                    | Floor; stair rail; door handle; research and office buildings                                      |
| 237.221  | 6.32 | Palmitelaidic acid                     | 0.94 | 0.00 | -3.37 | Food                                | Stair rail and door handle in office and research building                                         |
| 277.0776 | 4.79 | Clotrimazole                           | 0.95 | 0.00 | 0.00  | Non-prescription topical antifungal | Found in all buildings swabbed, on multiple surfaces                                               |
| 286.1434 | 5.49 | Piperine                               | 0.97 | 0.00 | 0.00  | Pepper constituent                  | Found in all building types (Microwave handle, garbage handle, elevator door button, refrigerator) |
| 301.285  | 5.22 | Cocamidopropyl Betaine                 | 0.92 | 0.00 | 0.00  | Detergent                           | Found in all building types                                                                        |
| 304.154  | 3.27 | Cocaine                                | 0.98 | 0.00 | -2.30 | Illicit drug                        | Several locations, including floor, door handles, elevator call button; in all 3 building types    |
| 356.243  | 6.99 | Piperonyl butoxide                     | 0.87 | 0.00 | -1.12 | Pesticide synergist                 | Floor; research and mixed-purpose                                                                  |
| 360.362  | 7.68 | Benzyltrimethylstearyl ammonium cation | 0.99 | 0.00 | 0.00  | Cleaning product, antiseptic        | Found in all building types, no real specifics.                                                    |

|          |       |                                                                                                                        |      |       |       |                                           |                                                                                                       |
|----------|-------|------------------------------------------------------------------------------------------------------------------------|------|-------|-------|-------------------------------------------|-------------------------------------------------------------------------------------------------------|
| 369.351  | 10.49 | Cholesterol                                                                                                            | 0.99 | 0.00  | -2.71 | Animal and human sterol                   | Door handles and microwave handle in office and research buildings                                    |
| 373.1275 | 5.49  | Tangeritin                                                                                                             | 0.96 | 0.00  | 0.00  | Natural product (citrus peels)            | Door handles, appliance handles, and common areas of all areas swabbed except for one office building |
| 391.284  | 6.83  | Diocetyl phthalate                                                                                                     | 0.95 | 0.00  | -2.56 | Plasticizer                               | Floor and water fountain; all building types                                                          |
| 415.254  | 7.51  | Nonaethylene glycol                                                                                                    | 0.96 | 0.00  | -1.93 | Detergent and surfactant                  | Floor and water fountain; all building types                                                          |
| 439.356  | 4.70  | Oleanolic Acid                                                                                                         | 0.94 | 0.00  | 0.00  | Pentacyclic triterpenoid natural product. | Multiple locations in Teaching building. Mostly floors, doors, and recycling containers.              |
| 465.103  | 3.25  | Astragalin (+O derivative)                                                                                             | 0.93 | 15.99 | -1.29 | Plant-derived natural product             | Floor and wooden statue; in all three building types                                                  |
| 565.118  | 3.66  | Quercetin 3-O-malonylglucoside (+CH <sub>2</sub> derivative)                                                           | 0.94 | 14.02 | -1.77 | Flavonoid (natural product)               | Floor; research and mixed-purpose                                                                     |
| 757.217  | 3.02  | 5,7-dihydroxy-2-[4-[(2S,3R,4S,5S,6R)-3,4,5-trihydroxy-6-(hydroxymethyl)oxan-2-yl]oxyphenyl]-3-[(2S,3R,4S,5S,6R)-3,4,5- | 0.97 | 0.00  | -2.77 | Flavonoid (natural product)               | Floor; research and mixed-purpose                                                                     |

|  |  |                                                                                                          |  |  |  |  |  |
|--|--|----------------------------------------------------------------------------------------------------------|--|--|--|--|--|
|  |  | trihydroxy-6-[[[(2R,3R,4R,5R,6S)-3,4,5-trihydroxy-6-methyloxan-2-yl]oxymethyl]oxan-2-yl]oxychromen-4-one |  |  |  |  |  |
|--|--|----------------------------------------------------------------------------------------------------------|--|--|--|--|--|

354 **Table 3. Additional molecules of interest detected on building surfaces.**

355

## 356 Discussion

357 Overall, our results support shaping of the building surface metabolome by building  
358 function (**Fig. 1**). We identified distinct overall chemical profiles between research, office and  
359 mixed-purpose buildings, including many molecules that are likely occupant-derived (*e.g.*  
360 palmitoyl ethanolamide). Although our study sampled only building surfaces and as such was  
361 not designed to assess molecule sources, many of the molecules we detected were also found  
362 in other LC-MS/MS analyses of the human skin and frequently touched objects, further  
363 supporting a human source (over 8,000 matches with MassIVE datasets MSV000079181,  
364 MSV000078683, MSV000078622 , MSV000080031 , MSV000079558, MSV000078556,  
365 MSV000078816, MSV000078556 , MSV000078816, MSV000078832, MSV000078993,  
366 MSV000079389 , MSV000078556 [8][20,21] and **Table 2**). The ability to link our data to prior  
367 metabolomics studies therefore strongly enhanced this data's usefulness. Future work will  
368 expand our study to investigate molecule transference from building surfaces to worker hands  
369 and vice versa.

370 Several food-derived molecules were found at higher levels in research buildings than in  
371 office buildings. This is likely due to the fact that the public areas sampled in the research  
372 buildings include the lunch room, while the office buildings do not have meal areas, and  
373 occupants either eat outside the building or at their desks (not sampled). Likewise, the  
374 prevalence of food molecules on cloth surfaces represent their presence on the chairs in these  
375 meal areas. The higher prevalence of palmitoyl ethanolamide and medications in the mixed-use



376 building likely reflects its high-traffic nature, whereas fewer people frequent the research and  
377 office buildings. We also observed a significant impact of sampling site (location and material,  
378 **Fig. 2**) on the overall recovered metabolite profile. This latter observation highlights the  
379 importance of standardizing sampling locations, as implemented here. Our selection of five  
380 buildings within the same organization (with the office and research buildings in the same  
381 research park) also helped limit possible confounders due for example to differential cleaning  
382 practices across organizations.

383         Some of the detected molecules may present a health risk. Phthalates for example have  
384 been linked to asthma and allergies [22]; exposure to detergents such as  
385 cocamidopropylbetaine (*m/z* 301.285 RT 5.22 min, detected in all building types) can cause  
386 allergic contact dermatitis [23]. However, it is important to note that only 34% of our dataset had  
387 family-level annotations, with 2.5% of molecules receiving compound-level annotations (level 2  
388 confidence per metabolomics standards initiative [17]). This highlights the major challenge of  
389 metabolomics studies of human-building interactions, the un-annotated “dark matter” [24].  
390 Linking molecules detected in one study with other LC-MS/MS studies of the built environment  
391 can help shed at least some insight on these molecules. Indeed, our results integrate well with  
392 prior studies of the built environment, with 21,185 matches to molecules in other studies of the  
393 built environment (out of 127,397 total dataset matches; MassIVE accession numbers  
394 MSV000079720, MSV000079714, MSV000079717, MSV000079706, MSV000079709 [7]).  
395 Annotated molecules shared between our study and this prior work include detergents (*e.g.*  
396 cocamidopropylbetaine), food products (*e.g.* constituents of pepper), illicit drugs (cocaine) and  
397 medications (*e.g.* erythromycin). Although the presence of cocaine in these settings may seem  
398 surprising, it is commonly found on US currency [25] and was previously reported in other  
399 studies of the built environment [7].

400         In conclusion, our results highlight the applicability of LC-MS/MS to study building-  
401 occupant interactions and to identify workplace chemical exposure risks, in a targeted setting.

402 Future work will be required to assess whether detected molecules present a health risk to  
403 employees and building visitors.

404

## 405 Acknowledgements

406 The authors would like to thank all the building managers who allowed us to collect  
407 samples from their buildings. The authors would also like to thank Wen Yang for helping with  
408 sample collection, and Shelley Kane and Adwaita Parab for assistance with molecule extraction.  
409 This work was supported by start-up funds from the University of Oklahoma.

410

## 411 References

- 412 [1] R.I. Adams, A.C. Bateman, H.M. Bik, J.F. Meadow, Microbiota of the indoor environment: a  
413 meta-analysis, *Microbiome*. 3 (2015) 49.
- 414 [2] National Academies of Sciences, Engineering, and Medicine, National Academy of  
415 Engineering, Division on Engineering and Physical Sciences, Health and Medicine Division,  
416 Division on Earth and Life Studies, Board on Infrastructure and the Constructed  
417 Environment, Board on Environmental Studies and Toxicology, Board on Life Sciences,  
418 Committee on Microbiomes of the Built Environment: From Research to Application,  
419 Microbiomes of the Built Environment: A Research Agenda for Indoor Microbiology, Human  
420 Health, and Buildings, National Academies Press (US), Washington (DC), 2017.
- 421 [3] J.F. Ruiz-Calderon, H. Cavallin, S.J. Song, A. Novoselac, L.R. Pericchi, J.N. Hernandez, R.  
422 Rios, O.H. Branch, H. Pereira, L.C. Paulino, M.J. Blaser, R. Knight, M.G. Dominguez-Bello,  
423 Walls talk: Microbial biogeography of homes spanning urbanization, *Sci Adv*. 2 (2016)

- 424 e1501061.
- 425 [4] S.W. Kembel, J.F. Meadow, T.K. O'Connor, G. Mhuireach, D. Northcutt, J. Kline, M.  
426 Moriyama, G.Z. Brown, B.J.M. Bohannan, J.L. Green, Architectural design drives the  
427 biogeography of indoor bacterial communities, *PLoS One*. 9 (2014) e87093.
- 428 [5] I. Paciência, J. Madureira, J. Rufo, A. Moreira, E. de O. Fernandes, A systematic review of  
429 evidence and implications of spatial and seasonal variations of volatile organic compounds  
430 (VOC) in indoor human environments, *J. Toxicol. Environ. Health B Crit. Rev.* 19 (2016)  
431 47–64.
- 432 [6] D.M. Stout 2nd, K.D. Bradham, P.P. Egeghy, P.A. Jones, C.W. Croghan, P.A. Ashley, E.  
433 Pinzer, W. Friedman, M.C. Brinkman, M.G. Nishioka, D.C. Cox, American Healthy Homes  
434 Survey: a national study of residential pesticides measured from floor wipes, *Environ. Sci.*  
435 *Technol.* 43 (2009) 4294–4300.
- 436 [7] D. Petras, L.-F. Nothias, R.A. Quinn, T. Alexandrov, N. Bandeira, A. Bouslimani, G. Castro-  
437 Falcón, L. Chen, T. Dang, D.J. Floros, V. Hook, N. Garg, N. Hoffner, Y. Jiang, C.A. Kaponó,  
438 I. Koester, R. Knight, C.A. Leber, T.-J. Ling, T. Luzzatto-Knaan, L.-I. McCall, A.P. McGrath,  
439 M.J. Meehan, J.K. Merritt, R.H. Mills, J. Morton, S. Podvin, I. Protsyuk, T. Purdy, K.  
440 Satterfield, S. Searles, S. Shah, S. Shires, D. Steffen, M. White, J. Todoric, R. Tuttle, A.  
441 Wojnicz, V. Sapp, F. Vargas, J. Yang, C. Zhang, P.C. Dorrestein, Mass Spectrometry-  
442 Based Visualization of Molecules Associated with Human Habitats, *Anal. Chem.* 88 (2016)  
443 10775–10784.
- 444 [8] C.A. Kaponó, J.T. Morton, A. Bouslimani, A.V. Melnik, K. Orlinsky, T.L. Knaan, N. Garg, Y.  
445 Vázquez-Baeza, I. Protsyuk, S. Janssen, Q. Zhu, T. Alexandrov, L. Smarr, R. Knight, P.C.  
446 Dorrestein, Creating a 3D microbial and chemical snapshot of a human habitat, *Sci. Rep.* 8  
447 (2018) 3669.
- 448 [9] J. Chen, E.M. Hartmann, J. Kline, K. Van Den Wymelenberg, R.U. Halden, Assessment of  
449 human exposure to triclocarban, triclosan and five parabens in U.S. indoor dust using

- 450 dispersive solid phase extraction followed by liquid chromatography tandem mass  
451 spectrometry, *J. Hazard. Mater.* 360 (2018) 623–630.
- 452 [10] M.G. Irwin, T. Trinh, C.-L. Yao, Occupational exposure to anaesthetic gases: a role for  
453 TIVA, *Expert Opin. Drug Saf.* 8 (2009) 473–483.
- 454 [11] S.E. Anderson, B.J. Meade, Potential health effects associated with dermal exposure to  
455 occupational chemicals, *Environ. Health Insights.* 8 (2014) 51–62.
- 456 [12] T. Pluskal, S. Castillo, A. Villar-Briones, M. Orešič, MZmine 2: Modular framework for  
457 processing, visualizing, and analyzing mass spectrometry-based molecular profile data,  
458 *BMC Bioinformatics.* 11 (2010) 395.
- 459 [13] J.G. Caporaso, J. Kuczynski, J. Stombaugh, K. Bittinger, F.D. Bushman, E.K. Costello, N.  
460 Fierer, A.G. Peña, J.K. Goodrich, J.I. Gordon, G.A. Huttley, S.T. Kelley, D. Knights, J.E.  
461 Koenig, R.E. Ley, C.A. Lozupone, D. McDonald, B.D. Muegge, M. Pirrung, J. Reeder, J.R.  
462 Sevinsky, P.J. Turnbaugh, W.A. Walters, J. Widmann, T. Yatsunenko, J. Zaneveld, R.  
463 Knight, QIIME allows analysis of high-throughput community sequencing data, *Nat.*  
464 *Methods.* 7 (2010) 335–336.
- 465 [14] J. Chong, O. Soufan, C. Li, I. Caraus, S. Li, G. Bourque, D.S. Wishart, J. Xia,  
466 *MetaboAnalyst 4.0: towards more transparent and integrative metabolomics analysis,*  
467 *Nucleic Acids Res.* 46 (2018) W486–W494.
- 468 [15] M. Wang, J.J. Carver, V.V. Phelan, L.M. Sanchez, N. Garg, Y. Peng, D.D. Nguyen, J.  
469 Watrous, C.A. Kaponov, T. Luzzatto-Knaan, C. Porto, A. Bouslimani, A.V. Melnik, M.J.  
470 Meehan, W.-T. Liu, M. Crüsemann, P.D. Boudreau, E. Esquenazi, M. Sandoval-Calderón,  
471 R.D. Kersten, L.A. Pace, R.A. Quinn, K.R. Duncan, C.-C. Hsu, D.J. Floros, R.G. Gavilan, K.  
472 Kleigrewe, T. Northen, R.J. Dutton, D. Parrot, E.E. Carlson, B. Aigle, C.F. Michelsen, L.  
473 Jelsbak, C. Sohlenkamp, P. Pevzner, A. Edlund, J. McLean, J. Piel, B.T. Murphy, L.  
474 Gerwick, C.-C. Liaw, Y.-L. Yang, H.-U. Humpf, M. Maansson, R.A. Keyzers, A.C. Sims,  
475 A.R. Johnson, A.M. Sidebottom, B.E. Sedio, A. Klitgaard, C.B. Larson, C.A.B. P, D. Torres-

- 476 Mendoza, D.J. Gonzalez, D.B. Silva, L.M. Marques, D.P. Demarque, E. Pociute, E.C.  
477 O'Neill, E. Briand, E.J.N. Helfrich, E.A. Granatosky, E. Glukhov, F. Ryffel, H. Houson, H.  
478 Mohimani, J.J. Kharbush, Y. Zeng, J.A. Vorholt, K.L. Kurita, P. Charusanti, K.L. McPhail,  
479 K.F. Nielsen, L. Vuong, M. Elfeki, M.F. Traxler, N. Engene, N. Koyama, O.B. Vining, R.  
480 Baric, R.R. Silva, S.J. Mascuch, S. Tomasi, S. Jenkins, V. Macherla, T. Hoffman, V.  
481 Agarwal, P.G. Williams, J. Dai, R. Neupane, J. Gurr, A.M.C. Rodríguez, A. Lamsa, C.  
482 Zhang, K. Dorrestein, B.M. Duggan, J. Almaliti, P.-M. Allard, P. Phapale, L.-F. Nothias, T.  
483 Alexandrov, M. Litaudon, J.-L. Wolfender, J.E. Kyle, T.O. Metz, T. Peryea, D.-T. Nguyen, D.  
484 VanLeer, P. Shinn, A. Jadhav, R. Müller, K.M. Waters, W. Shi, X. Liu, L. Zhang, R. Knight,  
485 P.R. Jensen, B.O. Palsson, K. Pogliano, R.G. Lington, M. Gutiérrez, N.P. Lopes, W.H.  
486 Gerwick, B.S. Moore, P.C. Dorrestein, N. Bandeira, Sharing and community curation of  
487 mass spectrometry data with Global Natural Products Social Molecular Networking, *Nat.*  
488 *Biotechnol.* 34 (2016) 828–837.
- 489 [16] K. Scheubert, F. Hufsky, D. Petras, M. Wang, L.-F. Nothias, K. Dührkop, N. Bandeira, P.C.  
490 Dorrestein, S. Böcker, Significance estimation for large scale metabolomics annotations by  
491 spectral matching, *Nat. Commun.* 8 (2017) 1494.
- 492 [17] L.W. Sumner, A. Amberg, D. Barrett, M.H. Beale, R. Beger, C.A. Daykin, T.W. -M. Fan, O.  
493 Fiehn, R. Goodacre, J.L. Griffin, T. Hankemeier, N. Hardy, J. Harnly, R. Higashi, J. Kopka,  
494 A.N. Lane, J.C. Lindon, P. Marriott, A.W. Nicholls, M.D. Reily, J.J. Thaden, M.R. Viant,  
495 Proposed minimum reporting standards for chemical analysis, *Metabolomics.* 3 (2007)  
496 211–221.
- 497 [18] P. Shannon, A. Markiel, O. Ozier, N.S. Baliga, J.T. Wang, D. Ramage, N. Amin, B.  
498 Schwikowski, T. Ideker, Cytoscape: a software environment for integrated models of  
499 biomolecular interaction networks, *Genome Res.* 13 (2003) 2498–2504.
- 500 [19] L. Breiman, 10.1023/A:1010933404324, *Machine Learning.* 45 (2001) 5–32.  
501 doi:10.1023/A:1010933404324.

- 502 [20] A. Bouslimani, C. Porto, C.M. Rath, M. Wang, Y. Guo, A. Gonzalez, D. Berg-Lyon, G.  
503 Ackermann, G.J. Moeller Christensen, T. Nakatsuji, L. Zhang, A.W. Borkowski, M.J.  
504 Meehan, K. Dorrestein, R.L. Gallo, N. Bandeira, R. Knight, T. Alexandrov, P.C. Dorrestein,  
505 Molecular cartography of the human skin surface in 3D, *Proc. Natl. Acad. Sci. U. S. A.* 112  
506 (2015) E2120–9.
- 507 [21] A. Bouslimani, A.V. Melnik, Z. Xu, A. Amir, R.R. da Silva, M. Wang, N. Bandeira, T.  
508 Alexandrov, R. Knight, P.C. Dorrestein, Lifestyle chemistries from phones for individual  
509 profiling, *Proc. Natl. Acad. Sci. U. S. A.* 113 (2016) E7645–E7654.
- 510 [22] J.J.K. Jaakkola, T.L. Knight, The role of exposure to phthalates from polyvinyl chloride  
511 products in the development of asthma and allergies: a systematic review and meta-  
512 analysis, *Environ. Health Perspect.* 116 (2008) 845–853.
- 513 [23] D. Sasseville, Occupational Contact Dermatitis, *Allergy Asthma Clin. Immunol.* 4 (2008) 59.
- 514 [24] R.R. da Silva, P.C. Dorrestein, R.A. Quinn, Illuminating the dark matter in metabolomics,  
515 *Proc. Natl. Acad. Sci. U. S. A.* 112 (2015) 12549–12550.
- 516 [25] Y. Zuo, K. Zhang, J. Wu, C. Rego, J. Fritz, An accurate and nondestructive GC method for  
517 determination of cocaine on US paper currency, *J. Sep. Sci.* 31 (2008) 2444–2450.
